## **Factors associated with cholera outbreaks, Nairobi County, July 2017: a case control study**

Valerian Mwenda<sup>1\*</sup>

[valmwenda@gmail.com](mailto:valmwenda@gmail.com)

Alexis Niyomwungere<sup>1, 2</sup>

[Niyoalex07@gmail.com](mailto:Niyoalex07@gmail.com)

Elvis Oyugi<sup>1</sup>

[eoyugi@feltp.or.ke](mailto:eoyugi@feltp.or.ke)

Jane Githuku<sup>1</sup>

[jgithuku@feltp.or.ke](mailto:jgithuku@feltp.or.ke)

Mark Obonyo<sup>3</sup>

[mobonyo@feltp.or.ke](mailto:mobonyo@feltp.or.ke)

Zeinab Gura<sup>1</sup>

[zgura@feltp.or.ke](mailto:zgura@feltp.or.ke)

<sup>1</sup>Field Epidemiology and Laboratory Training Programme, Ministry of Health, Nairobi, Kenya

<sup>2</sup>Disease Surveillance and Response Unit, Ministry of Health, Nairobi, Kenya

\*Corresponding author.

Abstract word count: 295 (with subheadings)

Manuscript body word count: 2586

Key words: Risk factors, cholera, Nairobi

## 1 **Abstract**

## 2 **Background**

3 Cholera affects 1.3-4 million people globally and causes 21000-143,000 deaths  
4 annually. Nairobi County in Kenya reported cholera cases since April 2017. We investigated to  
5 identify associated factors and institute control measures.

## 6 **Methods**

7 We reviewed the line-list of patients admitted at the Kenyatta National referral Hospital,  
8 Nairobi and performed descriptive epidemiology. We carried out a frequency-matched case  
9 control study, using facility-based cases and community controls. We defined a case as acute  
10 onset of watery diarrhoea of at least >3 stools/24hours with or without vomiting in person of  
11 any age, admitted in Kenyatta National Hospital as from July 1<sup>st</sup>, 2017. We calculated odds  
12 ratios and their respective 95% confidence intervals. We also took water samples at water  
13 reservoirs, distribution and consumer points, and made observation on hygiene and sanitation  
14 conditions in the community.

15

## 16 **Results**

17 We reviewed 71 line-listed cases; median age 30 years (range 2-86 years); 45 (63%)  
18 were male. First case was admitted on 14<sup>th</sup> April 2017. Culture was performed on 44 cases, 30  
19 (68%) was positive for *Vibrio cholerae*, biotype El-Tor, serotype Ogawa. There were 2 deaths  
20 (case fatality ratio 2.8%). Age-group  $\geq 25$  years was most affected. Drinking unchlorinated  
21 water (aOR 14.57, 95% CI 4.44-47.83), eating in public places (aOR 9.45, 95% CI 3.07-29.12)  
22 sourcing water from non-Nairobi city water company source (aOR 4.92, 95% CI 1.56-15.52)  
23 and having drunk untreated water in the previous week before the outbreak (aOR 3.21, 95% CI  
24 1.12-9.24) were independently associated with being a case in the outbreak. Out of 28 water  
25 samples, 4 (14%) had >180 coliforms/100mls; all were at consumer points.

26

27 **Conclusion**

28 Poor water quality and sanitation were responsible for this outbreak. We recommended  
29 adequate, clean water supply to unplanned settlements in Nairobi County, as well education of  
30 residents on water treatment at the household level.

31

32 **Author summary**

33 Cholera, a disease causing outbreaks in areas with low standards of hygiene and sanitation has  
34 afflicted humans for millennia. It is caused by a bacterium, *Vibrio Cholerae*, transmitted  
35 mainly through water contaminated by faecal matter. The resultant disease is acute watery  
36 diarrhoea, which causes death rapidly due to dehydration and shock. Virtually brought under  
37 control in the developed world due to improvements in hygiene, the disease still ravages many  
38 communities in low and middle income countries, as well as regions affected by conflict or  
39 natural disasters. In outbreak situations, rapid response in water treatment, sanitation  
40 improvement and setting up of cholera treatment centres for rehydration therapy reduces  
41 impact and saves lives. Long-term control can only be achieved through sustainable  
42 improvements in sanitation and standards of living. Case control studies in outbreak situations  
43 provide quick, actionable information to public health specialists during outbreak response.  
44 This study provides a cholera outbreak investigation in an urban informal settlement setting;  
45 the approach reported here can guide in outbreak investigations and response in similar  
46 settings globally.

47

48

49

50

51

52

## 53 **Introduction**

54 Cholera is an enteric infection caused by toxigenic *Vibrio cholerae* serogroup O1 and  
55 O139 [1]. Cholera is endemic in more than 50 countries globally and causes large epidemics  
56 in countries or regions facing complex emergencies including conflict, natural disasters like  
57 flooding or drought or massive displacement of persons [2]. It is estimated that every year, 1.3  
58 billion people are at risk, 1.3 to 4 million get infected and 21000 to 143000 deaths occur  
59 globally [3]. Up to 90% of infected people continue shedding the bacterium up to 14 days  
60 without or with mild symptoms making cholera outbreaks difficult to control [4].

61 Most cholera outbreaks occur in areas with inadequate supply of potable water and poor  
62 sanitation facilities, especially during rainy seasons [5]. Other factors identified as risk factors  
63 in previous epidemiological studies done in Kenya include lack of knowledge about cholera,  
64 proximity to a large water body, living in a refugee camp and eating food outside the home [6-  
65 10]. A cross-district analysis of cholera occurrence also identified open defaecation as a risk  
66 factor [11].

67 Increase in acute watery diarrhoea cases, confirmed to be cholera by culture, was  
68 reported in Nairobi County from April 2017 through the Integrated Disease Surveillance and  
69 Reporting (IDSR) system. Sporadic cases were reported in May and early June but an upsurge  
70 was observed in late June and July 2017. The epicentre of the outbreak was unplanned  
71 settlements from the Eastern suburbs of the city; however, cases were also reported in high end  
72 hotels and restaurants. Most of the cases were admitted at Kenyatta National Referral Hospital,  
73 since an ongoing nurses' industrial action had paralyzed tier one, two and three facilities [12].  
74 The Ministry of Health (MoH) deployed a team comprising of the Disease Surveillance and  
75 Response Unit (DSRU), the Kenya Field Epidemiology and Laboratory Training Programme  
76 (FELTP), Nairobi County Department of Health, National Public Health Laboratory (NPHL)  
77 and the Ministry of Water (MoW) to identify the associated factors and institute control.

## 78 **Methods**

### 79 **Investigation setting**

80 This investigation was carried out during July 24-28, 2017 in various locations in  
81 Nairobi County including the Kenyatta National Hospital (KNH) where most patients were  
82 admitted for care and five sub-counties: Embakasi South, Embakasi East, Embakasi West,  
83 Mathare and Starehe (**Figure 1**). These were the sub-counties from which the cases originated  
84 from. Nairobi County has an estimated population of 3.5 million residents as of 2016 and 6.5  
85 million with the suburbs included. Approximately 2.5 million of these live in unplanned  
86 settlements [13]. The city is divided into 17 sub-Counties, with 12 of them having reported  
87 cholera cases during the period Since May 2017.

### 88 **Retrospective review**

89 We reviewed the cholera line list from KNH up to July 16, 2017. The variables  
90 contained in the line list included Sub County of origin, residence (village/estate), age, sex, date  
91 of onset/admission/discharge, laboratory status and patient outcome. We conducted descriptive  
92 analysis of the updated and consolidated line list, describing the outbreak in terms of place of  
93 origin, time of symptoms onset and personal attributes like age and sex.

94

### 95 **Case control**

96 We then carried out a frequency matched case control study using facility cases from  
97 KNH and community controls from the most affected sub-counties. Cases were matched to  
98 controls using age groups (2-4, 5-14, 15-24, >24) years on a ratio of one case to two controls.  
99 Two years is the cut-off for cholera case definition in areas with active outbreaks as per the  
100 IDSR guidelines [14].

101

### 102 **Case definition**

103 We included both probable and confirmed cases in our investigation. A probable case

104 was defined as acute onset of watery diarrhoea of at least >3 stools/24hours with or without  
105 vomiting in a person  $\geq 2$  years, admitted in Kenyatta National Hospital as from July 1<sup>st</sup>, 2017. A  
106 confirmed case was culture positive.

107 Controls were defined as absence of diarrhoea in the preceding 30 days in any randomly  
108 selected person of the same age group as a particular case and came from the same Nairobi Sub-  
109 counties as cases. We administered verbal screening for symptom and admission questions to  
110 any control prior to enrolment into the study.

111 **Inclusion criteria-** Those who met the case/control definition and consented verbally to the  
112 study.

### 113 **Sample Size Calculation**

#### 114 **Assumptions**

115 We made the following assumptions while calculating the sample size for the study:  
116 Power 80%, 21.6% prevalence of exposure for hand washing before meals among controls [15]  
117 to detect a least an exposure odds ratio of 3.0, desired two-sided confidence intervals of 95%  
118 and a case: control ratio of 1:2. A minimum sample size of 132 (44 cases and 88 controls) was  
119 calculated using the Fleiss method [16].

120

#### 121 **Selection of cases**

122 Cases appearing in the consolidated KNH line list since July 1<sup>st</sup>, 2017 and still admitted  
123 in the hospital were eligible for inclusion in the study. The admission register in cholera  
124 treatment ward served as the sampling frame. We used simple random sampling to select the  
125 cases, and administered a structured questionnaire through face to face interview. Verbal  
126 consent was sought from the cases and legal guardians in case of a minor.

127

128

## 129 **Selection of Controls**

130 For each case we selected two population controls, distributed into five sub-counties.  
131 The sub-counties were selected on the basis of the number of cases reported, with the three with  
132 the most number of cases and two with the least number of cases. We visited the selected sub-  
133 counties, and used the administrative offices of the Sub-counties at as our starting point.  
134 Spinning a bottle to choose direction of proceeding, we selected every fifth household for  
135 selection of controls. In areas where the direction was interrupted by infrastructural installations  
136 like roads or industrial complexes, we spun the bottle a repeat time, to cover the expanse of the  
137 unplanned settlements. The resident Community Health Volunteers guided us on the  
138 demarcation of various households, due to the high population density in the settlements. We  
139 administered a structured questionnaire similar to the one for cases on the demographics and  
140 risk factor sections, but without clinical details section. Before the interview, controls were  
141 screened for cholera-like symptom history, including diarrhoea, vomiting, abdominal pains, and  
142 cholera case in the household, in the previous one month.

## 143 **Environmental testing**

144 We collected water samples for testing from the Nairobi city water company pipeline  
145 system and households, using sterile containers. For the water company system, the testing was  
146 done at the water treatment sites/ reservoirs, during piping and selected consumer points.  
147 Samples were also collected from conveniently selected control households, from the affected  
148 sub-counties, as well as from some public establishments like schools in the affected sub-  
149 counties. Analysis of the samples was undertaken at the NPHL. General bacteriological analysis  
150 through the most probable number (MPN) was used to estimate faecal coliform count. Levels of  
151 residual chlorine were measured using automated colorimetry and physical conductivity tests  
152 done [17].

153

154

## 155 **Data management**

156 Data obtained was entered into a computer database, cleaned and analysed. Measures of  
157 central tendency and dispersion for continuous variables and proportions for categorical  
158 variables were calculated. We calculated odds of various exposures among the cases and  
159 controls and corresponding odds ratios (OR). Factors with a P-value of  $\leq 0.15$  [18] at bivariate  
160 analysis were included in unconditional logistic regression model, using the forward selection  
161 approach. A confidence interval excluding the null value of OR significant in the final model.  
162 During logistic regression, the matching variable (age group) was maintained in the model till  
163 the end of the analysis.

164

## 165 **Ethical considerations**

166 Informed consent was obtained orally from all study participants and recorded in the  
167 interview questionnaire; written consent was difficult because the study was conducted during  
168 emergency outbreak response. Confidentiality of the information from the participants was  
169 maintained at all times. We did not collect any personal identification information, the  
170 questionnaires were kept in a locked cabinet during data entry and the computer database  
171 created protected by a password, accessible only to the principal investigator. This being a  
172 public health emergency response, we did not seek approval of the investigation from an  
173 independent research and ethics committee. However, approval was sought from the Ministry of  
174 Health and permission to conduct the investigation from the County Government of Nairobi  
175 Department of Health.

176

## 177 **Results**

### 178 **Retrospective review**

179 The consolidated line list had 71 cases as at July 16, 2017. The median age was 30  
180 years (Inter-quartile range 12.5); 45 (63%) were males. A total of 44 cases had culture done; 30



181 (68%) were positive. There were 2 deaths, case fatality rate 2.8%. Age group above 25 years  
182 was the most affected (**Table 1**). The three Embakasi Sub-Counties (East, West and South) had  
183 the highest number of cases at 25 (36%). The first cholera case was admitted to KNH on April  
184 14, 2017; sporadic cases were admitted in May 2017. Several peaks were observed in late June  
185 and early July 2017 (**Figure 2**).

### 186 **Case control findings**

187 Mean age was 30.9 years $\pm$ 9.0 years for cases and 28.8 years $\pm$ 9.0 years for controls; 31  
188 (71%) of cases and 30 (33%) of controls were male. Thirty-five cases (80%) and 55 (60%)  
189 controls had completed secondary education (**Table 2**). Most of the cases had presented with  
190 watery diarrhoea (98%) and vomiting (80%). The median hospitalization period for the cases  
191 was 3 days, range 2-5 days. Only 19 (43%) of the cases sought care within 6 hours initial  
192 symptoms.

### 193 **Bivariate analysis**

194 Cases had 10 times higher odds of using unchlorinated water (OR 10.31, 95% CI 3.96-  
195 26.89), nine times higher odds of taking meals at public eating places (OR 8.97, 95% CI 3.52-  
196 22.30) and not washing hands after toilet (OR 8.91, 95% CI 2.46-39.62) at bivariate analysis.  
197 (**Table 3**).

### 198 **Multivariate analysis**

199 After controlling for confounders, drinking unchlorinated water (aOR 14.57, 95% CI  
200 4.44-47.83), taking meals at public eating places (aOR 9.45, 95% CI 3.07-29.12) and sourcing  
201 drinking water from non-city water company sources (aOR 4.92, 95% CI 1.56-15.52) were  
202 independently associated with being a case in the outbreak (**Table 3**).

203

### 204 **Water testing and environmental findings**

205 Out of 28 water samples, four (14%) had >180 coliforms/100ml of water; from a  
206 restaurant, secondary school kitchen, residential apartments and a public water point. Of the 17

207 samples that underwent conductivity and residual chlorine testing, all had between 0.4-1.2 ppm  
208 (recommended range 0.2-5.0) of residual chlorine and 74.3-87.0 $\mu$ S/cm (recommend range 0-  
209 800) on conductivity levels.

210

## 211 **Discussion**

212 Our investigation found use of untreated drinking water and taking meals away from  
213 home as risk factors in this outbreak in a major urban setting. Association with taking meals at  
214 public eating establishments was also a finding during the investigation of protracted outbreaks  
215 in Kenya in 2014-2016 [10] and is important in prevention of future urban food-borne  
216 outbreaks. Majority of urban residents take at least one meal daily away from their households  
217 highlighting importance of safe public eating places. Some of the water samples at consumer  
218 points were contaminated.

219 Cholera outbreaks have affected various counties in Kenya since December 2014 [19].  
220 Water and sanitation is a major factor in cholera transmission in most outbreaks globally [20].  
221 The current outbreak affected relatively younger individuals and males more than females.  
222 Males are likely to consume different types of meals regarded as 'high risk' outside the home  
223 during occupational ventures, hence predisposing them to higher risk of contracting food borne  
224 diseases [21]. The case fatality of 3% for the patients admitted at the referral facility (KNH) is  
225 unexpectedly high, with CFR expected to be less than 1% if proper treatment is instituted  
226 promptly [22]. This can be explained by several contextual realities affecting both the Nairobi  
227 County and National public health system at the time. Nurses were in the middle of an industrial  
228 action, therefore all the public dispensaries and health centres were non-functional. Since these  
229 usually serve as the avenues for setting up Cholera Treatment Centres (CTC), the resultant  
230 effect was delayed proper management and late referral to the national referral hospital. Peaks  
231 of cases in June and July were as a result of outbreaks during mass gathering of people on  
232 various occasions [23].

233 On risk factor analysis, using untreated water and taking meals in public eating places  
234 were noted as important exposures associated with being a case in the outbreak. Since the  
235 epicentre of this outbreak was from informal settlements in the city, contaminated water as well  
236 as unhygienic eating places, especially serving casual labourers in the adjacent industries were  
237 likely avenues for disease transmission. The affected sub counties boarder the Nairobi city  
238 industrial complex, where many young men work as casual labourers and eat from food  
239 vendors, a recognized ecological risk factor for the disease [24]. Majority of the residents were  
240 getting water that is illegally piped in unhygienic environment, especially in open sewer  
241 trenches. Failure to undertake domestic treatment of this water before use is therefore a major  
242 point of exposure to many waterborne diseases.

243 The water sampled from the city water company at holding reservoirs and distribution  
244 networks had adequate residual chlorination and conduction levels. Therefore contamination of  
245 the four samples likely occurred downstream during transmission to households. This could be  
246 caused by illegal connections into the distribution network. Contaminated water is the main  
247 vehicle of cholera transmission worldwide and offers opportunities for disease control [25].

248 We found several gaps in response to the outbreak. First, the initial cases were not fully  
249 investigated till the peaks in June and July occurred; this was a lost opportunity since promptly  
250 investigating and instituting control measures reduces extent, scope and possibility of  
251 propagation of outbreaks [26]. No cholera treatment centres (CTCs) were set up in the affected  
252 Sub-counties; patients had to be ferried to the referral facility likely aiding disease transmission.  
253 The best practice would have been to treat cholera at the sites of the outbreak. The nurses' strike  
254 reduced the effectiveness of the response, and likely contributed to the protracted course of the  
255 outbreak. Provision of water to most informal settlements in Nairobi is inadequate; water  
256 vendors and illegal connections fill in the gap but expose residents to unpotable water for  
257 human consumption.

258 Cholera control and prevention can be achieved in various ways. Of these, water,  
259 sanitation and hygiene improvement are the most effective, with water treatment preventing up  
260 to 90% of water borne diseases [27]. Cholera vaccination has only been effective in outbreak  
261 situations when offered together with provision of safe water and improving environmental  
262 hygiene [28]. Primary prevention in form of sanitizing the environment and provision of safe  
263 water are also effective against cholera and other water and food borne diseases.

264 Our investigation had limitations. The sampling of the water was not random, as advised  
265 by the WHO [29] therefore may not be representative to the water in use in the settlements from  
266 which the cases and controls came from. We also did not manage to tests the water samples for  
267 *Cholerae vibrio*, nor did we associate the contaminated water samples with the exact origin of  
268 the cases.

### 269 **Public health action**

270 We supported the Nairobi County Department of Health (CDoH) in setting up and  
271 operationalizing CTCs in the two most affected sub-counties, as well as health education and  
272 provision of water treatment supplies. We also trained the Community Health Volunteers on  
273 first aid and quick response when assisting cholera victims as well as the Sub-County disease  
274 surveillance coordinators on proper data capture, management and timely transmission to the  
275 DSRU. The communities were sensitized on cholera symptoms, importance of prompt seeking  
276 of care if the disease is suspected, importance of water, sanitation and hygiene (WASH)  
277 practices and various methods of water treatment.

278

### 279 **Conclusion**

280 We confirmed that this cholera outbreak, with epicentres in several informal settlements  
281 in Nairobi, was associated with taking untreated water and eating meals at public eating places.  
282 Long term control requires investment in improving clean water supply to the informal

283 settlements, in adequate amounts, throughout the year.

284 **Acknowledgements**

285 We wish to thank the Nairobi County Department of health, Sub-county disease surveillance

286 officers and community health assistants for their support during this study.

## References

1. Harris JB, LaRocque RC, Qadri F, Ryan ET, Calderwood SB: **Cholera**. *The Lancet*, **379**(9835):2466-2476.
2. Jutla A, Khan R, Colwell R: **Natural Disasters and Cholera Outbreaks: Current Understanding and Future Outlook**. *Current environmental health reports* 2017, **4**(1):99-107.
3. Ali M, Nelson AR, Lopez AL, Sack DA: **Updated global burden of cholera in endemic countries**. *PLoS neglected tropical diseases* 2015, **9**(6):e0003832.
4. Barzilay EJ, Schaad N, Magloire R, Mung KS, Boncy J, Dahourou GA, Mintz ED, Steenland MW, Vertefeuille JF, Tappero JW: **Cholera surveillance during the Haiti epidemic—the first 2 years**. *New England Journal of Medicine* 2013, **368**(7):599-609.
5. Jutla A, Whitcombe E, Hasan N, Haley B, Akanda A, Huq A, Alam M, Sack RB, Colwell R: **Environmental Factors Influencing Epidemic Cholera**. *The American Journal of Tropical Medicine and Hygiene* 2013, **89**(3):597-607.
6. Mutonga D, Langat D, Mwangi D, Tonui J, Njeru M, Abade A, Irura Z, Njeru I, Dahlke M: **National surveillance data on the epidemiology of cholera in Kenya, 1997–2010**. *The Journal of infectious diseases* 2013, **208**(suppl\_1):S55-S61.
7. Mohamed AA, Oundo J, Kariuki SM, Boga HI, Sharif SK, Akhwale W, Omolo J, Amwayi AS, Mutonga D, Kareko D: **Molecular epidemiology of geographically dispersed *Vibrio cholerae*, Kenya, January 2009–May 2010**. *Emerging infectious diseases* 2012, **18**(6):925.
8. Onyango D, Karambu S, Abade A, Amwayi S, Omolo J: **High case fatality cholera outbreak in Western Kenya, August 2010**. *Pan African Medical Journal* 2013, **15**(1).
9. Stoltzfus JD, Carter JY, Akpinar-Elci M, Matu M, Kimotho V, Giganti MJ, Langat D, Elci OC: **Interaction between climatic, environmental, and demographic factors on cholera outbreaks in Kenya**. *Infectious diseases of poverty* 2014, **3**(1):37.
10. George G: **Notes from the field: ongoing cholera outbreak—Kenya, 2014–2016**. *MMWR Morbidity and mortality weekly report* 2016, **65**.
11. Cowman G, Otipu S, Njeru I, Achia T, Thirumurthy H, Bartram J, Kioko J: **Factors associated with cholera in Kenya, 2008-2013**. *Pan African Medical Journal* 2017, **28**(101).
12. Lancet: **Kenya's nurses strike takes its toll on health-care system**. *The Lancet*, **389**(10087):2350.
13. **World Population Review: Kenyan population**. Available at <http://worldpopulationreview.com/countries/kenya-population/>. Last accessed December 4, 2017.
14. **Kenya Integrated Disease Surveillance and Response Guidelines**. Available at [http://guidelines.health.go.ke:8000/media/Standard\\_Case\\_Definitions\\_for\\_Priority\\_Diseases\\_in\\_Kenya-Integ.pdf](http://guidelines.health.go.ke:8000/media/Standard_Case_Definitions_for_Priority_Diseases_in_Kenya-Integ.pdf). Last accessed April 12, 2018. In.
15. Hutin Y, Luby S, Paquet C: **A large cholera outbreak in Kano City, Nigeria: the importance of hand washing with soap and the danger of street-vended water**. *Journal of Water and Health* 2003, **1**(1):45-52.
16. Ibrahim MA: **The Case-control Study Consensus and Controversy**, vol. 32: Elsevier; 2014.
17. Organization WH: **Guidelines for drinking-water quality: first addendum to the fourth edition**. 2017.
18. Bursac Z, Gauss CH, Williams DK, Hosmer DW: **Purposeful selection of variables in logistic regression**. *Source code for biology and medicine* 2008, **3**(1):17.

19. **WHO. Emergency preparedness and response. Cholera in Kenya. Available at <http://www.who.int/csr/don/21-july-2017-cholera-kenya/en/>. Last accessed December 4, 2017.**
20. Wright J, Gundry S, Conroy R: **Household drinking water in developing countries: a systematic review of microbiological contamination between source and point-of-use.** *Tropical medicine & international health* 2004, **9**(1):106-117.
21. Shiferaw B, Verrill L, Booth H, Zansky SM, Norton DM, Crim S, Henao OL: **Sex-based differences in food consumption: Foodborne Diseases Active Surveillance Network (FoodNet) population survey, 2006–2007.** *Clinical infectious diseases* 2012, **54**(suppl\_5):S453-S457.
22. **WHO. Prevention and control of cholera outbreaks. Available at <http://www.who.int/cholera/technical/prevention/control/en/>. Last accessed April 2, 2018**
23. **Ministry of Health, Kenya. Cholera response, 2017. Available at <http://www.health.go.ke/2017/07/government-close-two-hotels-to-contain-cholera-outbreak/>. Last accessed January 15, 2018.**
24. Hunter P: **Waterborne disease: epidemiology and ecology:** John Wiley & Sons; 1997.
25. Taylor DL, Kahawita TM, Cairncross S, Ensink JH: **The impact of water, sanitation and hygiene interventions to control cholera: a systematic review.** *PLoS one* 2015, **10**(8):e0135676.
26. Mwambi P, Mufunda J, Lupili M, Bangwe K, Bwalya F, Mazaba M: **Timely Response and Containment of 2016 Cholera Outbreak in Northern Zambia.** *Medical Journal of Zambia* 2016, **43**(2):64-69.
27. Fewtrell L, Kaufmann RB, Kay D, Enanoria W, Haller L, Colford JM: **Water, sanitation, and hygiene interventions to reduce diarrhoea in less developed countries: a systematic review and meta-analysis.** *The Lancet infectious diseases* 2005, **5**(1):42-52.
28. Clemens J, Holmgren J: **When, how, and where can oral cholera vaccines be used to interrupt cholera outbreaks?** In: *Cholera Outbreaks.* edn.: Springer; 2013: 231-258.
29. Organization WH: **Guidelines for drinking-water quality [electronic resource]: incorporating 1st and 2nd addenda, vol. 1, Recommendations.** 2008.

**Table 1: Attack rates for different age groups and sex, cholera outbreak in Nairobi County, July 2017**

| Age | Age group | Number of cases | Total population | Attack rate (per 100,000 population) |
|-----|-----------|-----------------|------------------|--------------------------------------|
|     | <4 years  | 2               | 407988           | 0.49                                 |
|     | 5-14      | 6               | 564906           | 1.06                                 |
|     | 15-24     | 7               | 753209           | 0.93                                 |
|     | ≥25       | 56              | 1412266          | 4.00                                 |
| Sex | Male      | 45              | 1605230          | 2.80                                 |
|     | Female    | 26              | 1533139          | 1.70                                 |

**Table 2: Sociodemographic characteristics of the study participants**

| Variable                            | Cases (n=44) | Controls (n=92) |
|-------------------------------------|--------------|-----------------|
| Age (mean years, SD)                | 30.9 (9.0)   | 28.3 (9.0)      |
| Sex                                 |              |                 |
| Male                                | 31 (70.5)    | 30 (32.6)       |
| Female                              | 13 (29.5)    | 62 (67.4)       |
| Religion                            |              |                 |
| Christianity                        | 43 (97.7)    | 89 (96.7)       |
| Islam                               | 1 (2.3)      | 3 (3.3)         |
| Occupation                          |              |                 |
| Business person                     | 10 (22.7)    | 29 (31.5)       |
| Employed/self employed              | 21 (47.7)    | 16 (48.9)       |
| House wife                          | 0 (0.0)      | 16 (17.4)       |
| Student/pupil                       | 5 (11.4)     | 7 (7.6)         |
| Unemployed                          | 1 (2.3)      | 11 (12.0)       |
| Unskilled labor/casual              | 6 (13.6)     | 5 (5.4)         |
| Missing                             | 1 (2.3)      | 8 (8.7)         |
| Period of stay in current residence |              |                 |
| < 3 months                          | 4 (9.1)      | 4 (4.4)         |
| > 1 year                            | 33 (75.0)    | 71 (77.2)       |
| 3 - 6 months                        | 4 (9.1)      | 9 (9.8)         |
| 6 - 12 months                       | 3 (6.8)      | 8 (8.7)         |
| Education status                    |              |                 |
| None/Madrassa                       | 0 (0.0)      | 3 (3.3)         |
| Primary complete                    | 8 (18.2)     | 31 (33.7)       |
| Primary incomplete                  | 1 (2.3)      | 3 (3.3)         |
| Secondary complete                  | 13 (29.6)    | 47 (51.1)       |
| Tertiary                            | 22 (50.0)    | 8 (8.7)         |



**Table 3: Bivariate and multivariate analysis of factors associated with cholera outbreak, Nairobi County, July 2017**

| Exposure variable                             | Cases n (%) | Controls n (%) | Crude OR (95 % CI)  | aOR                |
|-----------------------------------------------|-------------|----------------|---------------------|--------------------|
| Not Treating drinking water                   |             |                |                     |                    |
| Yes                                           | 21 (47.7)   | 19(20.7)       | 3.51 (1.61-7.63)    | NA                 |
| No                                            | 23 (52.3)   | 73 (79.3)      | Ref                 |                    |
| Drinking water from Borehole                  |             |                |                     |                    |
| Yes                                           | 6 (13.6)    | 1 (1.1)        | 14.37 (1.63-667.91) | NA                 |
| No                                            | 38 (86.4)   | 91 (98.9)      | Ref                 |                    |
| Drinking water from non-municipal supplies    |             |                |                     |                    |
| Yes                                           | 20 (45.5)   | 12 (13.0)      | 5.56 (2.38-12.98)   | 4.92 (1.56-15.52)  |
| No                                            | 24 (54.5)   | 80 (87.0)      | Ref                 |                    |
| Storing drinking water in uncovered container |             |                |                     |                    |
| Yes                                           | 10 (22.7)   | 4 (4.4)        | 6.47 (1.70-29.74)   | NA                 |
| No                                            | 34 (77.3)   | 88 (95.6)      | Ref                 |                    |
| Drinking untreated water in previous week     |             |                |                     |                    |
| Yes                                           | 32 (74.4)   | 39 (52.0)      | 2.69 (1.18-6.10)    | 3.21 (1.12-9.24)   |
| No                                            | 11 (25.6)   | 36 (48.0)      | Ref                 |                    |
| Not chlorinating water before drinking        |             |                |                     |                    |
| Yes                                           | 38 (86.4)   | 35 (38.0)      | 10.31 (3.96-26.89)  | 14.57 (4.44-47.83) |
| No                                            | 6 (13.6)    | 57 (62.0)      | Ref                 |                    |
| Not Washing hands before eating               |             |                |                     |                    |
| Yes                                           | 10 (22.7)   | 3 (3.3)        | 8.53 (2.0-50.22)    | NA                 |
| No                                            | 34 (77.3)   | 87 (96.7)      | Ref                 |                    |
| Not Washing hands after visit to toilet       |             |                |                     |                    |
| Yes                                           | 13 (29.6)   | 4 (4.5)        | 8.91 (2.46-39.62)   | NA                 |
| No                                            | 31 (70.4)   | 85 (95.5)      | Ref                 |                    |
| Eating away from home                         |             |                |                     |                    |
| Yes                                           | 37 (84.1)   | 31 (37.3)      | 8.87 (3.52-22.30)   | 9.45 (3.07-29.12)  |
| No                                            | 7 (15.9)    | 52 (62.7)      | Ref                 |                    |

Ref: reference group, NA: not included in logistic regression, OR: odds ratio, aOR: adjusted odds ratio

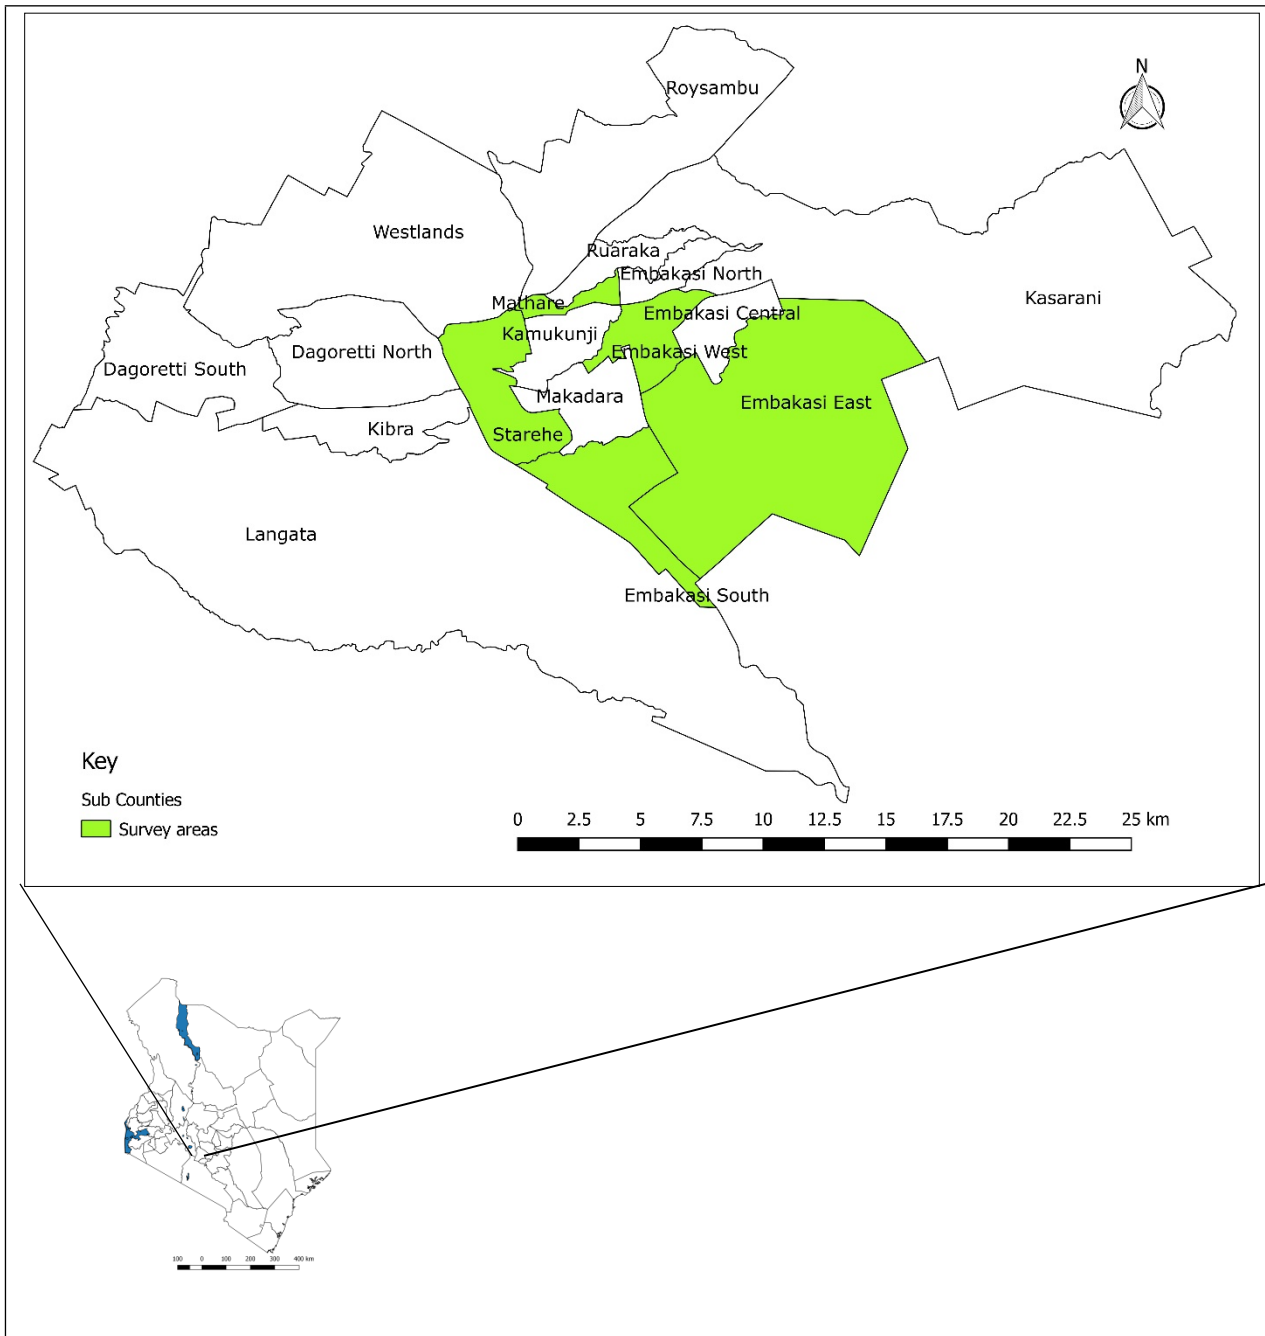

**Figure 1: Map of Nairobi County, showing the study sites (Sub-counties affected by the Cholera outbreak) highlighted in green. (Maps produced using QGIS, a free and open source Geographic Information System, available at <https://qgis.org/en/site/>).**

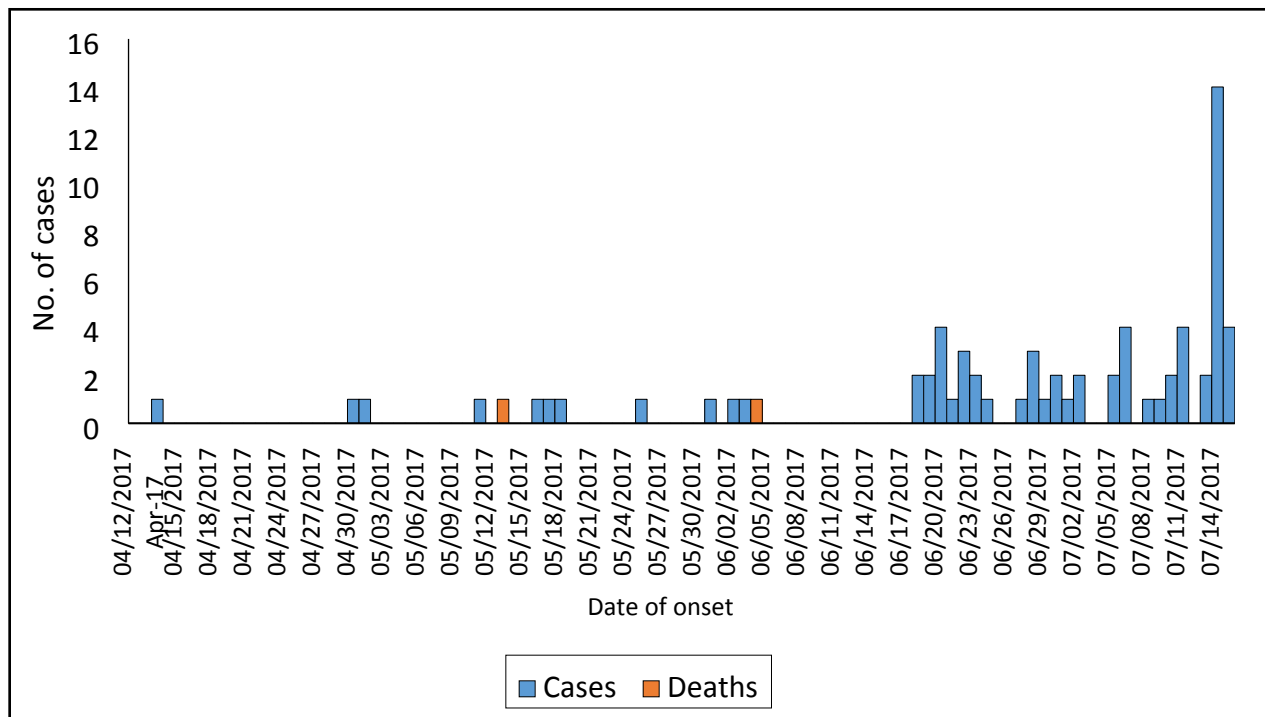

**Figure 2: Epidemic curve, Cholera patients at Kenyatta National Hospital, July 2017 (N=71)**

### Supporting information files legends

S1: Article submission cover letter.

S2: Filled STROBE Checklist for a case control study.
